# Supplementary material for: pH, solvent and metal ion induced octamolybdate-based metal–organic complexes decorated with a pyridyl-carboxylate ligand containing an amide group
Source: Royal Society of Chemistry journal article supplement (doi:10.1039/c5ce02297e), 2015-12-22
Supplement: c5ce02297e1.pdf [file c5ce02297e1.pdf]

Supplementary Material (ESI) for CrystEngComm

This journal is © The Royal Society of Chemistry

**pH, solvent and metal ions induced octamolybdate-based  
metal–organic complexes decorated by pyridyl-carboxylate  
ligand containing amide group †**

**Xiuli Wang,\* Danna Liu, Hongyan Lin, Guocheng Liu, Xiang Wang, Mao Le, Xing Rong**

*Department of Chemistry, Bohai University, Jinzhou, 121000, P. R. China*

**Table S1** Selected bond distances (Å) and angles (°) for compounds 1–3.

| Compound 1                                                                |            |                      |            |
|---------------------------------------------------------------------------|------------|----------------------|------------|
| Cu(1)-O(5)#1                                                              | 1.942(3)   | O(1)-Cu(1)-O(16)#3   | 86.88(11)  |
| Cu(1)-N(6)#1                                                              | 1.961(3)   | N(1)-Cu(1)-O(16)#3   | 87.41      |
| Cu(1)-N(1)                                                                | 1.981(3)   | O(5)#1-Cu(1)-O(16)#3 | 94.49      |
| Cu(1)-O(1)                                                                | 1.984(2)   | O(3)#2-Cu(1)-O(16)#3 | 167.77     |
| Cu(1)-O(3)#2                                                              | 2.342(3)   | N(6)#1-Cu(1)-O(16)#3 | 91.72      |
| Cu(1)-O(16) #3                                                            | 2.655(3)   | N(2)#2-Cu(2)-O(1W)#2 | 89.95      |
| Cu(2)-O(2)#2                                                              | 2.002(2)   | O(1W)-Cu(2)-O(1W)#2  | 180        |
| Cu(2)-O(2)                                                                | 2.002(2)   | O(2)#2-Cu(2)-O(2)    | 180        |
| Cu(2)-N(2)#2                                                              | 2.016(3)   | O(2)#2-Cu(2)-N(2)#2  | 86.64(12)  |
| Cu(2)-N(2)                                                                | 2.016(3)   | N(2)-Cu(2)-O(1W)     | 90.05      |
| Cu(2)-O(1W)                                                               | 2.453(3)   | O(2)#2-Cu(2)-O(1W)   | 79.26(12)  |
| Cu(2)-O(1W)#2                                                             | 2.453(3)   | O(2)-Cu(2)-N(2)      | 86.64(12)  |
| O(5)#1-Cu(1)-N(6)#1                                                       | 83.93(11)  | N(2)#2-Cu(2)-N(2)    | 180        |
| O(5)#1-Cu(1)-N(1)                                                         | 97.64(11)  | O(2)#2-Cu(2)-O(2)    | 180        |
| N(6)#1-Cu(1)-N(1)                                                         | 178.26(13) | O(2)-Cu(2)-N(2)#2    | 93.36(12)  |
| O(5)#1-Cu(1)-O(1)                                                         | 178.41(12) | O(2)#2-Cu(2)-N(2)    | 93.36(12)  |
| N(6)#1-Cu(1)-O(1)                                                         | 95.25(11)  | O(2)-Cu(2)-O(1W)     | 79.26(11)  |
| N(1)-Cu(1)-O(1)                                                           | 83.19(11)  | N(2)#2-Cu(2)-O(1W)   | 90.05(11)  |
| O(5)#1-Cu(1)-O(3)#2                                                       | 97.42(11)  | O(1W)#2-Cu(2)-O(1W)  | 180.00(11) |
| N(6)#1-Cu(1)-O(3)#2                                                       | 92.23(11)  | N(2)-Cu(2)-O(1W)#2   | 89.95(11)  |
| N(1)-Cu(1)-O(3)#2                                                         | 88.31(11)  | O(2)#2-Cu(2)-O(1W)#2 | 79.26(11)  |
| O(1)-Cu(1)-O(3)#2                                                         | 81.24(10)  | O(2)-Cu(2)-O(1W)#2   | 100.74(12) |
| Symmetry code for 1: #1 x-1, y+1, z; #2 -x+1, -y-1, -z+1; #3 x, 1 + y, z. |            |                      |            |
| Compound 2                                                                |            |                      |            |
| Cu(1)-O(1W)#2                                                             | 1.976(3)   | O(21)#4-Cu(1)-O(1)   | 88.09(12)  |
| Cu(1)-O(1W)                                                               | 1.976(3)   | O(1W)#2-Cu(1)-O(1)#2 | 89.13(12)  |
| Cu(1)-O(21)#3                                                             | 1.985(3)   | O(1W)-Cu(1)-O(1)#2   | 90.87(12)  |
| Cu(1)-O(21)#4                                                             | 1.985(3)   | O(21)#3-Cu(1)-O(1)#2 | 88.09(12)  |
| Cu(1)-O(1)                                                                | 2.390(3)   | O(21)#4-Cu(1)-O(1)#2 | 91.91(12)  |
| Cu(1)-O(1)#2                                                              | 2.390(3)   | O(1)-Cu(1)-O(1)#2    | 180        |
| Cu(2)-N(1)                                                                | 1.961(3)   | O(18)-Cu(2)-O(18)#3  | 180        |
| Cu(2)-O(18)                                                               | 1.943(3)   | O(18)-Cu(2)-N(1)#3   | 96.66(13)  |

## Supplementary Material (ESI) for CrystEngComm

This journal is © The Royal Society of Chemistry

|                       |            |                      |            |
|-----------------------|------------|----------------------|------------|
| Cu(2)-O(18)#3         | 1.943(3)   | O(18)#3-Cu(2)-N(1)#3 | 83.34(13)  |
| Cu(2)-N(1)#3          | 1.961(3)   | O(18)-Cu(2)-N(1)     | 83.34(13)  |
| Cu(2)-O2              | 2.611(3)   | O(18)#3-Cu(2)-N(1)   | 96.66(13)  |
| Cu(2)-O2#3            | 2.611(3)   | N(1)#3-Cu(2)-N(1)    | 180        |
| O(1W)#2-Cu(1)-O(1W)   | 179.999(2) | N(1)-Cu(2)-O(2)      | 93.96(12)  |
| O(1W)#2-Cu(1)-O(21)#3 | 93.99(13)  | N(1)#3-Cu(2)-O(2)    | 86.04(12)  |
| O(1W)-Cu(1)-O(21)#3   | 86.01(13)  | O(18)-Cu(2)-O(2)     | 100.76(12) |
| O(1W)#2-Cu(1)-O(21)#4 | 86.01(13)  | O(18)#3-Cu(2)-O(2)   | 79.25(12)  |
| O(1W)-Cu(1)-O(21)#4   | 93.99(13)  | N(1)-Cu(2)-O(2)#3    | 86.04(12)  |
| O(21)#3-Cu(1)-O(21)#4 | 179.998(1) | N(1)#3-Cu(2)-O(2)#3  | 93.96(12)  |
| O(1W)#2-Cu(1)-O(1)    | 90.87(12)  | O(18)-Cu(2)-O(2)#3   | 79.24(12)  |
| O(1W)-Cu(1)-O(1)      | 89.13(12)  | O(18)#3-Cu(2)-O(2)#3 | 100.76(12) |
| O(21)#3-Cu(1)-O(1)    | 91.91(12)  | O(2)-Cu(2)-O(2)#3    | 180        |

Symmetry code for **2**: #2  $-x-2, -y, -z+2$ ; #3  $-x-1, -y, -z+2$ ; #4  $x-1, y, z$

### Compound 3

|                  |            |                       |            |
|------------------|------------|-----------------------|------------|
| Co(1)-O(1)       | 2.040(3)   | N(2)-Co(1)-N(1)       | 89.42(12)  |
| Co(1)-O(2)       | 2.050(3)   | O(1)-Co(1)-O(10)#2    | 90.09(11)  |
| Co(1)-O(1W)      | 2.120(3)   | O(2)-Co(1)-O(10)#2    | 91.81(11)  |
| Co(1)-N(2)       | 2.130(3)   | O(1W)-Co(1)-O(10)#2   | 88.96(12)  |
| Co(1)-N(1)       | 2.133(3)   | N(2)-Co(1)-O(10)#2    | 92.25(11)  |
| Co(1)-O(10)#2    | 2.160(3)   | N(1)-Co(1)-O(10)#2    | 168.16(12) |
| Co(2)-O(3W)#3    | 2.081(4)   | O(3W)#3-Co(2)-O(3W)   | 180        |
| Co(2)-O(3W)      | 2.081(4)   | O(3W)#3-Co(2)-O(4W)#3 | 87.90(17)  |
| Co(2)-O(4W)#3    | 2.097(3)   | O(3W)-Co(2)-O(4W)#3   | 92.10(17)  |
| Co(2)-O(4W)      | 2.097(3)   | O(3W)#3-Co(2)-O(4W)   | 92.10(17)  |
| Co(2)-O(2W)#3    | 2.110(4)   | O(3W)-Co(2)-O(4W)     | 87.90(17)  |
| Co(2)-O(2W)      | 2.110(4)   | O(4W)#3-Co(2)-O(4W)   | 180        |
| O(1)-Co(1)-O(2)  | 173.51(12) | O(3W)#3-Co(2)-O(2W)#3 | 91.7(2)    |
| O(1)-Co(1)-O(1W) | 94.34(13)  | O(3W)-Co(2)-O(2W)#3   | 88.3(2)    |
| O(2)-Co(1)-O(1W) | 91.89(12)  | O(4W)#3-Co(2)-O(2W)#3 | 88.64(14)  |
| O(1)-Co(1)-N(2)  | 95.70(12)  | O(4W)-Co(2)-O(2W)#3   | 91.36(14)  |
| O(2)-Co(1)-N(2)  | 78.04(11)  | O(3W)#3-Co(2)-O(2W)   | 88.3(2)    |
| O(1W)-Co(1)-N(2) | 169.88(13) | O(3W)-Co(2)-O(2W)     | 91.7(2)    |
| O(1)-Co(1)-N(1)  | 78.08(13)  | O(3W)#3-Co(2)-O(2W)#3 | 91.7(2)    |
| O(2)-Co(1)-N(1)  | 100.00(13) | O(3W)-Co(2)-O(2W)#3   | 88.3(2)    |
| O(1W)-Co(1)-N(1) | 91.45(13)  | O(4W)#3-Co(2)-O(2W)#3 | 88.64(14)  |

Symmetry code for **3** #2  $x+1, y, z$ ; #3  $-x, -y, -z$ .

**Table S2.** Selected hydrogen-bonding geometry (Å, °) for compounds **1–3**.

|                   | D–H⋯A             | D–H  | H⋯A  | D⋯A    | D–H⋯A |
|-------------------|-------------------|------|------|--------|-------|
| Compound <b>1</b> | C(24)–H(24A)⋯O(6) | 0.93 | 2.38 | 3.3036 | 170   |
| Compound <b>2</b> | C(8)–H(8A)⋯O(5)   | 0.93 | 2.47 | 3.1204 | 127   |
| Compound <b>3</b> | N(5)–H(5B)⋯O(5)   | 0.86 | 1.95 | 2.7812 | 163   |

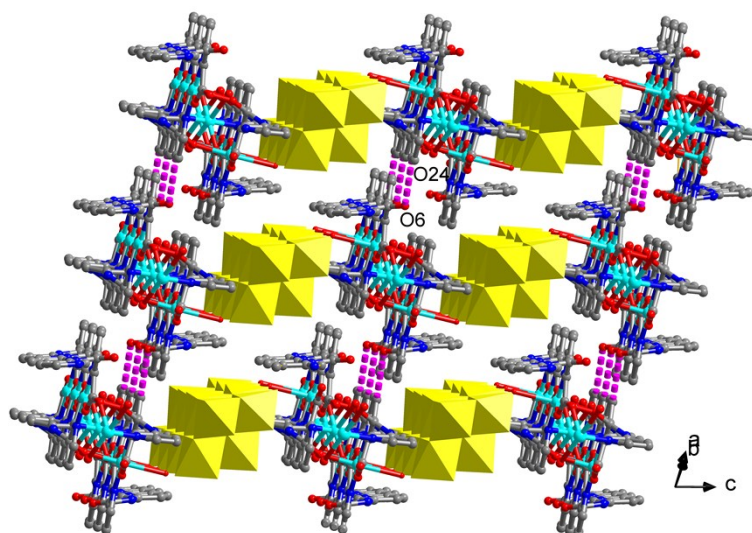

Fig. S1 The 3D supramolecular structure in 1.

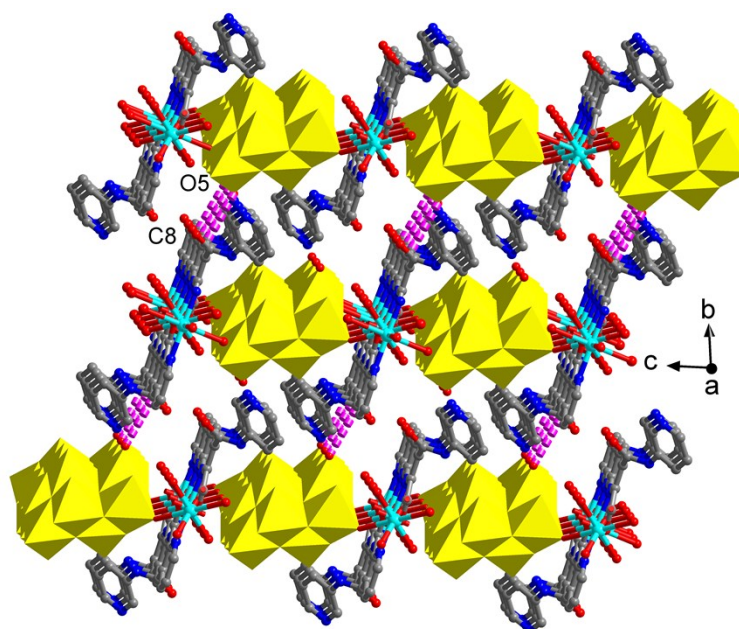

Fig. S2 The 3D supramolecular structure in 2.

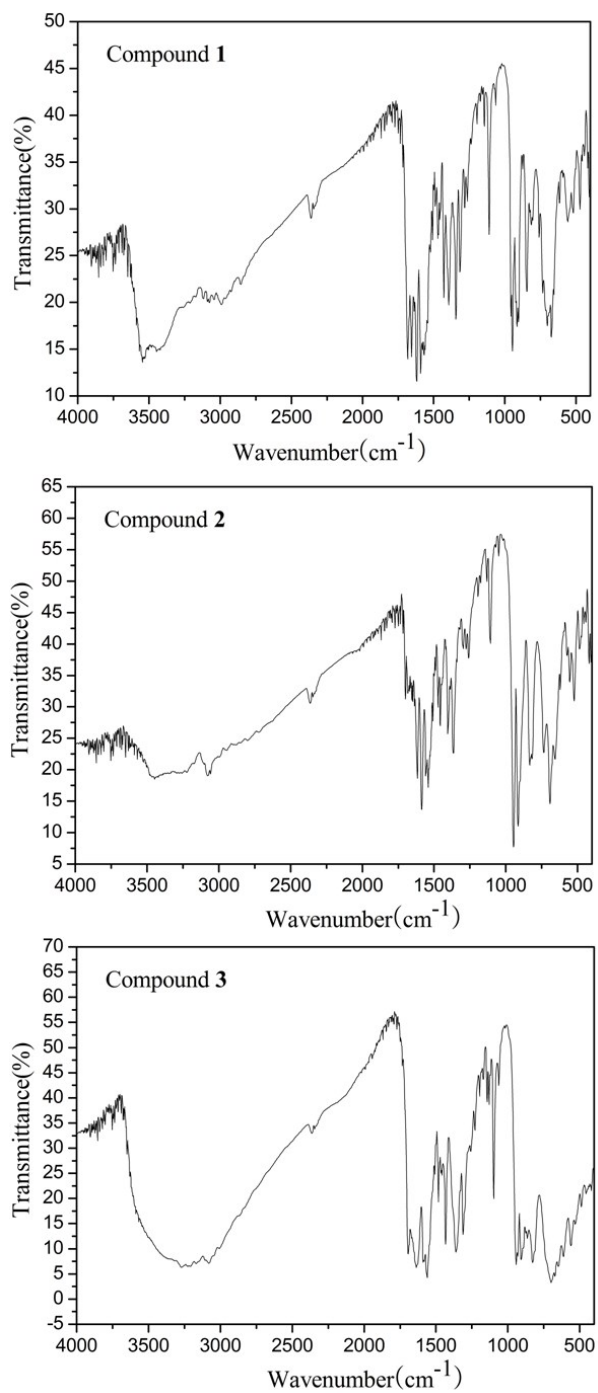

Fig. S3. The IR spectra of compounds 1-3.

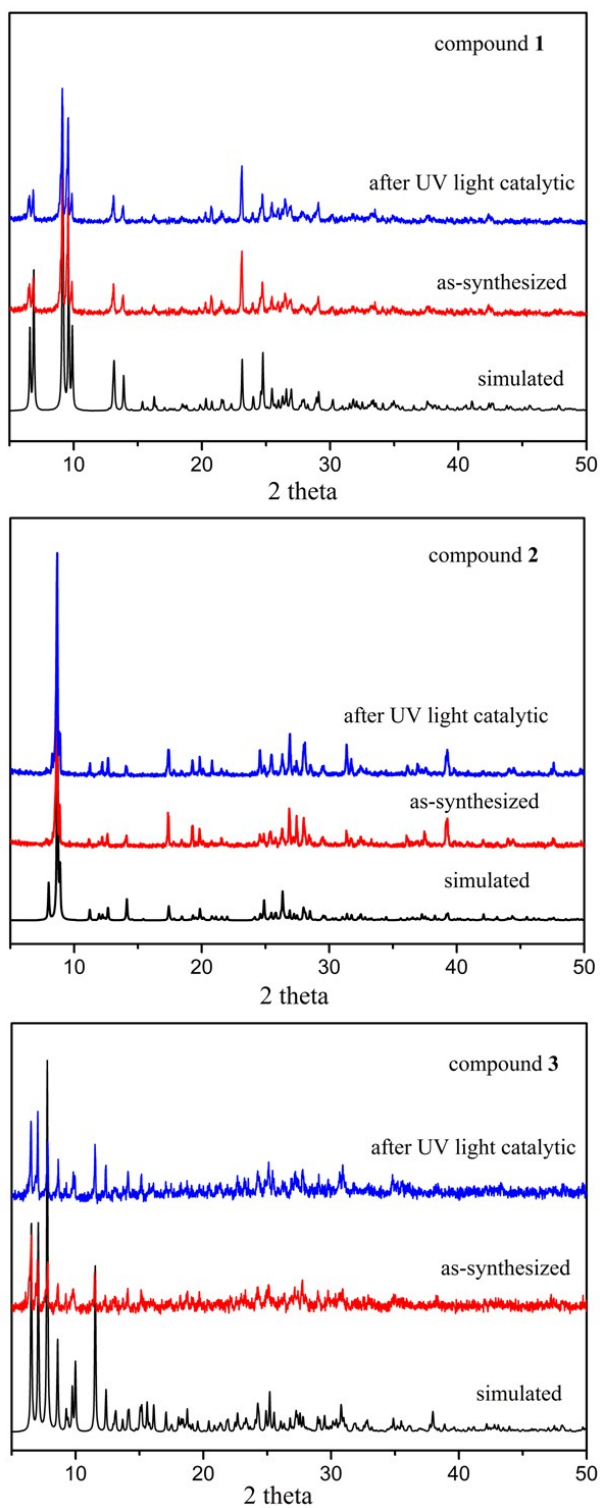

Fig. S4. The PXRD of compounds 1–3.

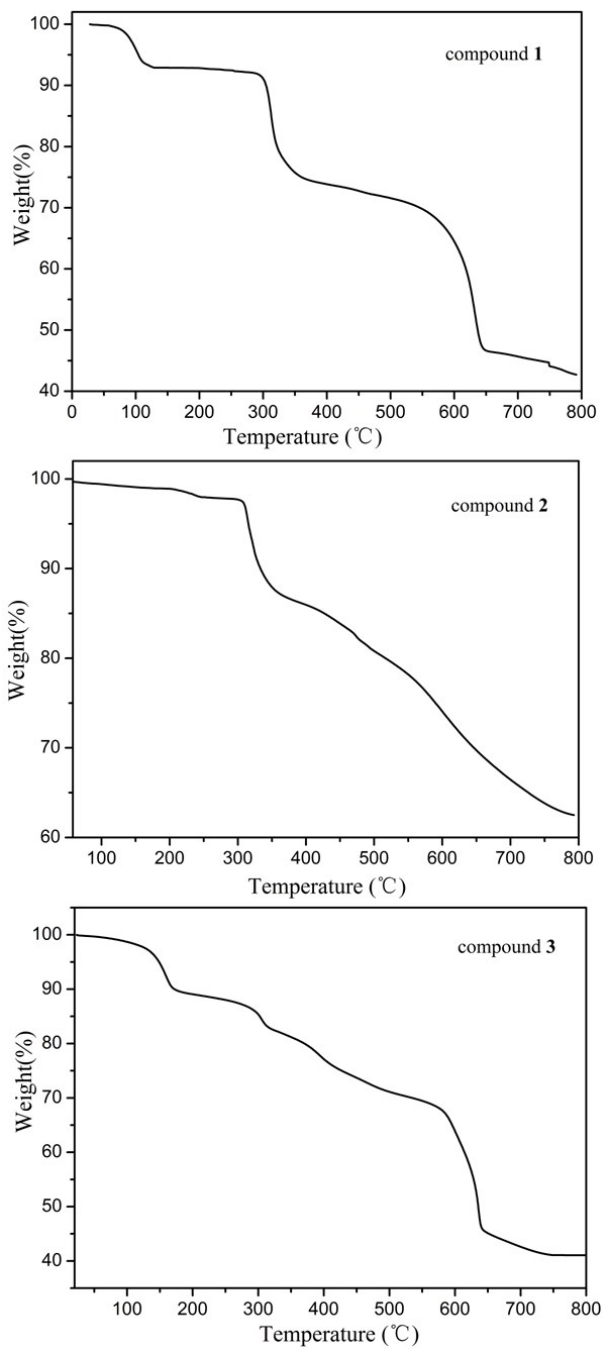

**Fig. S5.** The TG curves of compounds 1–3.

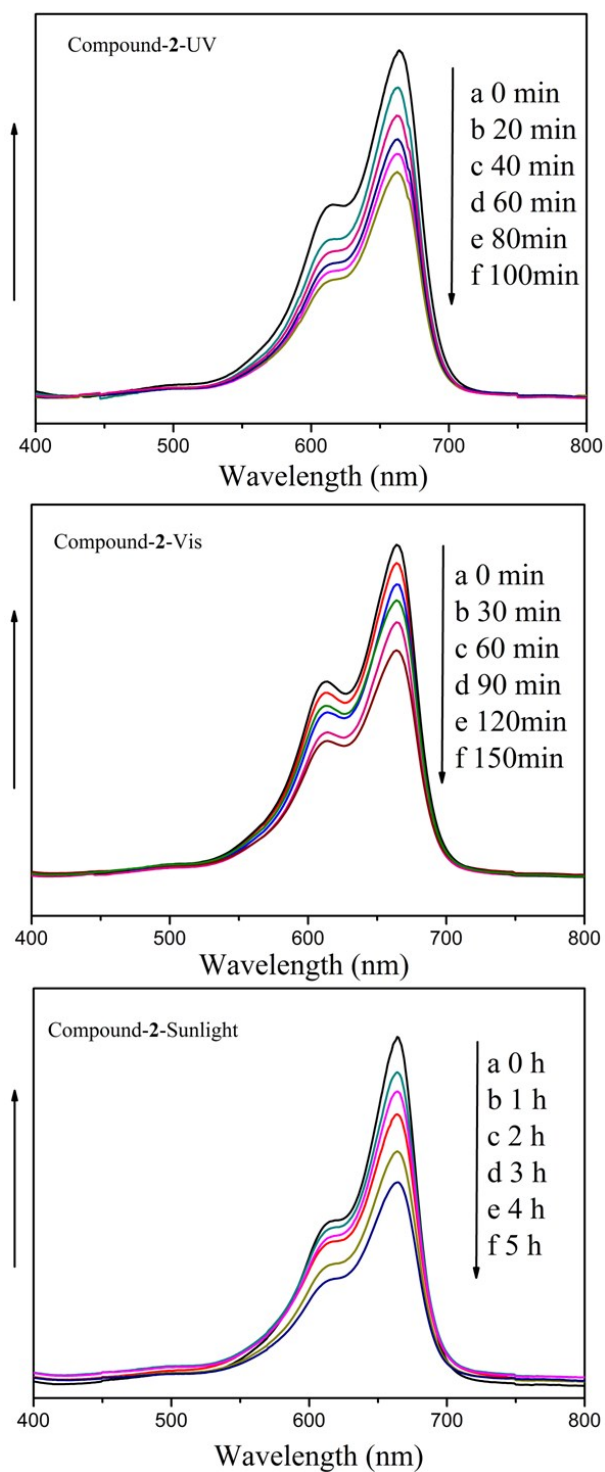

**Fig. S6.** Absorption spectra of the MB solution during the decomposition reaction under UV (a), visible (b) and sunlight (c) irradiation in the presence of the compound 2.

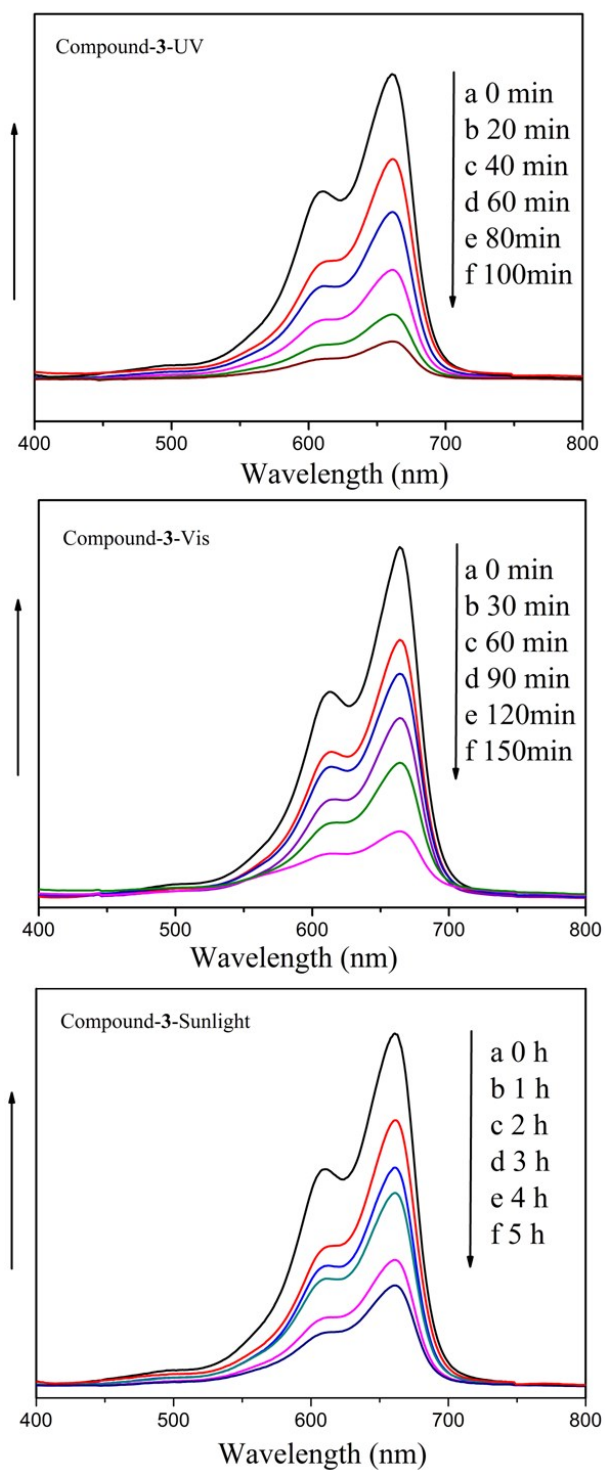

**Fig. S7.** Absorption spectra of the MB solution during the decomposition reaction under UV (a), visible (b) and sunlight (c) irradiation in the presence of the compound 3.
